# Supplementary material for: Predicting STAT1 as a prognostic marker in patients with solid cancer
Source: PubMed Central journal article supplement — Ther Adv Med Oncol. 2020 May 8;12:1758835920917558. doi: 10.1177/1758835920917558 (PMC7222261; doi:10.1177/1758835920917558), 2020-05-08
Supplement: Supplemental_Material_1.pdf [file Supplemental_Material_1.pdf]

## Supplemental Material 1: Full search strings for both PubMed and Web of Science

The query keywords are: “Prognoses OR Prognosis OR Factors, Prognostic OR Prognostic Factor” AND “Signal Transducer and Activator of Transcription 1 OR STAT1 OR STAT1 Transcription Factor OR STAT91 OR Transcription Factor STAT91 OR STAT-91 Transcript Factor” AND “Neoplasia OR Neoplasm OR Tumor OR Tumors OR Cancer OR Cancers OR Malignancy”. Extended references from selected articles were also checked for identifying other relevant studies.

For example:

| Add to builder      | Query                                                                                                                                                                                                                                                                                                                                                                                                                                                                                                                                                                                                                                                                                                     | Items found         |
|---------------------|-----------------------------------------------------------------------------------------------------------------------------------------------------------------------------------------------------------------------------------------------------------------------------------------------------------------------------------------------------------------------------------------------------------------------------------------------------------------------------------------------------------------------------------------------------------------------------------------------------------------------------------------------------------------------------------------------------------|---------------------|
| <a href="#">Add</a> | Search (((((((((Prognoses) OR Prognostic Factors) OR Factor, Prognostic) OR Factors, Prognostic) OR Prognostic Factor)) OR "Prognosis"[Mesh])) AND (((((((((Transcription Factor, STAT1) OR Transcription Factor STAT91) OR Gamma-Activated Factor, 91 kDa) OR STAT-91 Transcription Factor) OR STAT 91 Transcription Factor) OR Transcription Factor, STAT-91) OR STAT-91 Protein) OR STAT91 Transcription Factor) OR STAT1 Protein) OR (Signal Transducer and Activator of Transcription 1))) OR "STAT1 Transcription Factor"[Mesh])) AND (((((((((Neoplasia) OR Neoplasias) OR Neoplasm) OR Tumors) OR Tumor) OR Cancer) OR Cancers) OR Malignancy)) OR "Neoplasms"[Mesh])) Sort by: <b>Best Match</b> | <a href="#">245</a> |

  

Click here to try the **New PubMed!**  
An updated version of PubMed is now available. Come see the new improvements to the interface!

Article types: Clinical Trial, Review, Customize...  
Text availability: Abstract, Free full text, Full text  
Publication dates: 5 years, 10 years, Custom range...  
Species: Humans, Other Animals  
[Clear all](#)  
[Show additional filters](#)

Format: Summary | Sort by: Best Match | Per page: 20 | Send to | Filters: [Manage Filters](#)

**Search results**  
Items: 1 to 20 of 245

Sort by: Best match | Most recent

Results by year

Find related data  
Database: Select

Best match search information  
MeSH Terms: transcription factors; carcinoma; prognosis; cysts; neurofibromatoses; neurofibroma; neoplasms; stat1 transcription factor

- [IFN- \$\gamma\$ -mediated inhibition of lung cancer correlates with PD-L1 expression and is regulated by PI3K-AKT signaling.](#)  
Gao Y, Yang J, Cai Y, Fu S, Zhang N, Fu X, Li L.  
*Int J Cancer*. 2018 Aug 15;143(4):931-943. doi: 10.1002/ijc.31357. Epub 2018 Mar 25.  
PMID: 29516506 [Free Article](#)  
[Similar articles](#)
- [Control of tumor-associated macrophages and T cells in glioblastoma via AHR and CD39.](#)  
Takenaka MC, Gabriely G, Rothhammer V, Mascanfroni ID, Wheeler MA, Chao CC, Gutiérrez-Vázquez C, Kenison J, Tjon EC, Barroso A, Vandeventer T, de Lima KA, Rothweiler S, Mayo L, Ghannam S, Zandee S, Healy L, Sherr D, Farez MF, Prat A, Antel J, Reardon DA, Zhang H, Robson SC, Getz G, Weiner HL, Quintana FJ.  
*Nat Neurosci*. 2019 May;22(5):729-740. doi: 10.1038/s41593-019-0370-y. Epub 2019 Apr 8. Erratum in: *Nat Neurosci*. 2019 Sep;22(9):1533.  
PMID: 30962630  
[Similar articles](#)
- [Heterozygous STAT1 gain-of-function mutations underlie an unexpectedly broad clinical phenotype.](#)  
Toubiana J, Okada S, Hiller J, Oleastro M, Lagos Gomez M, Aldave Becerra JC, Ouachée-Chardin M, Fouyssac F, Girisha KM, Etzioni A, Van Montfrans J, Camcioglu Y, Kerns LA, Belohradsky B, Blanche S, Bousfiha A, Rodríguez-Gallego C, Meyts I, Kisand K, Reichenbach J, Renner ED, Rosenzweig S, Grimbacher B, van de Veerdonk FL, Traidl-Hoffmann C, Picard C, Marodi L, Morio T, Kobayashi M, Lilić D, Milner JD, Holland S, Casanova JL, Puel A; International STAT1 Gain-of-Function Study Group.  
*Blood*. 2016 Jun 23;127(25):3154-64. doi: 10.1182/blood-2015-11-679902. Epub 2016 Apr 25.  
PMID: 27114460 [Free PMC Article](#)  
[Similar articles](#)

Note: Search articles from PubMed (<https://www.ncbi.nlm.nih.gov/pubmed>).

Web of Science InCites Journal Citation Reports Essential Science Indicators EndNote Publons Kopernio 登录 帮助 简体中文

# Web of Science

Clarivate Analytics

检索 工具 检索和跟踪 检索历史 标记结果列表

检索结果: 574 (来自 Web of Science 核心合集)

您的检索: 所有字段: (signal transducer and activator of transcription 1 OR STAT1 OR transcription factor STAT91) AND 所有字段: (neoplasia OR neoplasm OR tumour OR tumor OR cancer OR malignancy) AND 所有字段: (prognosis OR prognoses OR prognostic factor)

时间跨度: 1900-2019. 索引: SCI-EXPANDED, SSCI, A&HCI, CPCI-S, CPCI-SSH, BKCI-S, BKCI-SSH, ESCI, CCR-EXPANDED, IC.

...更少内容

创建跟踪

### 精炼检索结果

在如下结果集内检索...

过滤结果依据:

- 领域中的高被引论文 (5)
- 开放获取 (354)
- 相关数据 (12)

排序方式: 日期 被引频次 使用次数 相关性 更多

选择页面 导出... 添加到标记结果列表

1. **Impact of aromatase inhibitor treatment on global gene expression and its association with antiproliferative response in ER plus breast cancer in postmenopausal patients**  
 作者: Gao, Qiong; Lopez-Knowles, Elena; Cheang, Maggie Chon U.; 等.  
 团体作者: POETIC Trial Management Grp  
 BREAST CANCER RESEARCH 卷:22 期:1 文献号:2 出版年: DEC 31 2019  
[UC-eLinks](#) [出版商处的免费全文](#) [查看摘要](#)
2. **Circular RNA circMTO1 acts as an antitumor factor in rectal cancer cell lines by downregulation of miR-19b-3p**  
 作者: Fan, Mingfeng; Wang, Yueqing; Gao, Shubo  
 JOURNAL OF CELLULAR BIOCHEMISTRY  
 在线发表日期: DEC 2019  
[UC-eLinks](#) [查看摘要](#)
3. **Systematic analysis of survival-associated alternative splicing signatures in clear cell renal cell carcinoma**  
 作者: Chen, Tao; Zheng, Wenzhong; Chen, Jianbo; 等.  
 JOURNAL OF CELLULAR BIOCHEMISTRY  
 在线发表日期: DEC 2019  
[UC-eLinks](#) [查看摘要](#)
4. **Transmembrane and Ubiquitin-Like Domain Containing 1 Protein (TMUB1) Negatively Regulates Hepatocellular Carcinoma Proliferation via Regulating Signal Transducer and Activator of Transcription 1 (STAT3)**

分析检索结果  
创建引文报告

被引频次: 0 (来自 Web of Science 的核心合集)  
使用次数

Note: Search articles from Web of Science (<http://www.webofscience.com>).
